# Supplementary material for: Production of antigenically stable enterovirus A71 virus-like particles in Pichia pastoris as a vaccine candidate
Source: PubMed Central journal article supplement — bioRxiv. 2023 Feb 2:2023.01.30.526315. Preprint. [Version 1] doi: 10.1101/2023.01.30.526315 (PMC9915507; doi:10.1101/2023.01.30.526315), 2023-02-02
Supplement: NIHPP2023.01.30.526315v1-supplement-1.pdf [file NIHPP2023.01.30.526315v1-supplement-1.pdf]

618 **Supplementary material:**

619 **Figure S1:**

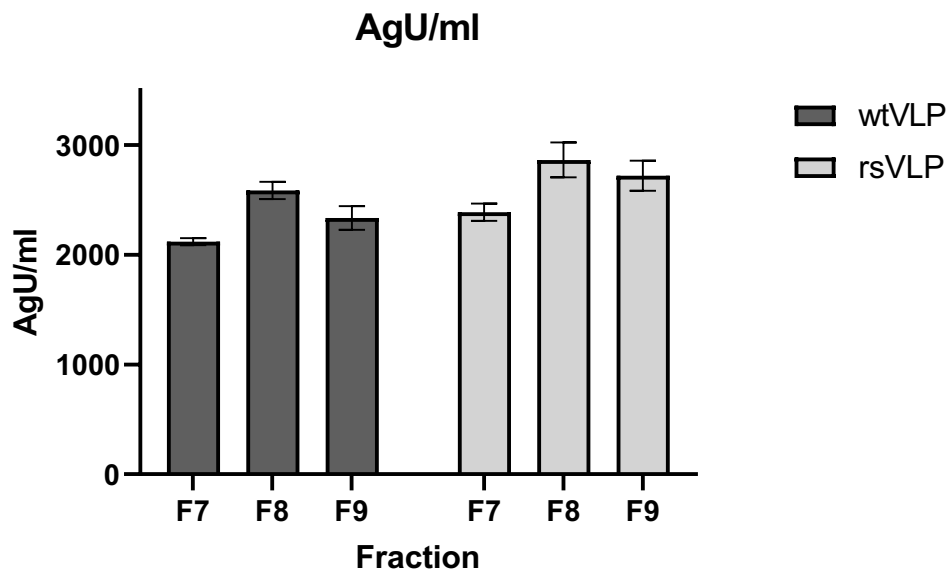

620

621 **Figure S1:** Antigen concentration (AgU/ml) of peak VLP fractions determined by the CT11F9  
622 antibody relative to the 18/116 antigen standard.

623

624 **Figure S2:**

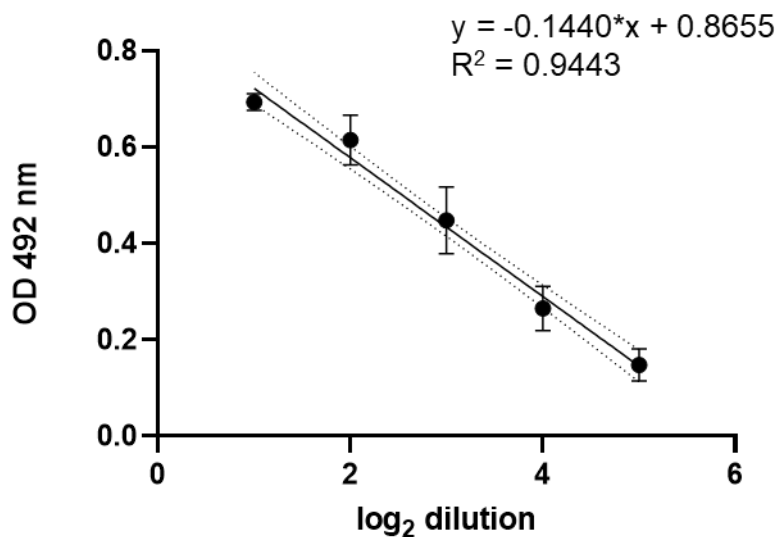

625

626 **Figure S2:** Relationship between OD and log<sub>2</sub> dilution of antigen, used to calculate the  
627 proportion of HA<sub>g</sub> in samples.

628

629

630

631 **Figure S3:**

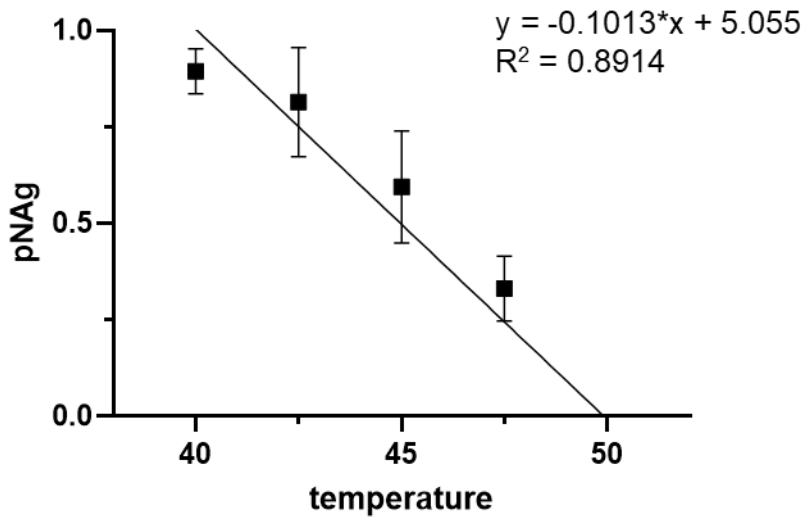

632

633 **Figure S3:** Linear regression to estimate antigenic conversion temperature of rsVLPs  
634 between 40°C and 50°C.

635

636 **Figure S4:**

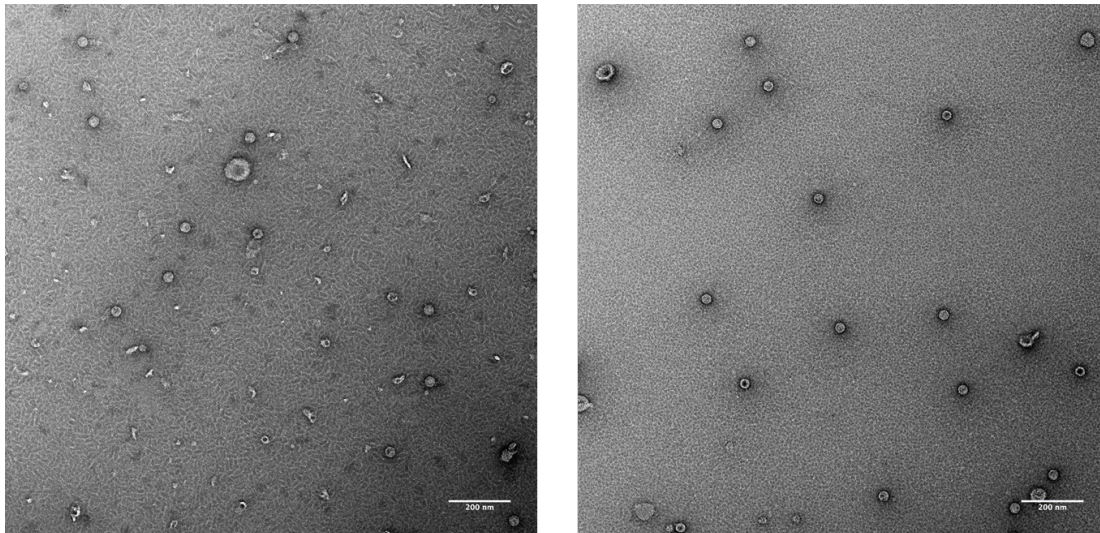

637

638 **Figure S4:** Negative stain TEM (using 2% UA) of samples of wtVLPs (left) and rsVLPs (right),  
639 scale bar = 200 nm.

640

641

642

643

644

645

646 **Figure S5:**

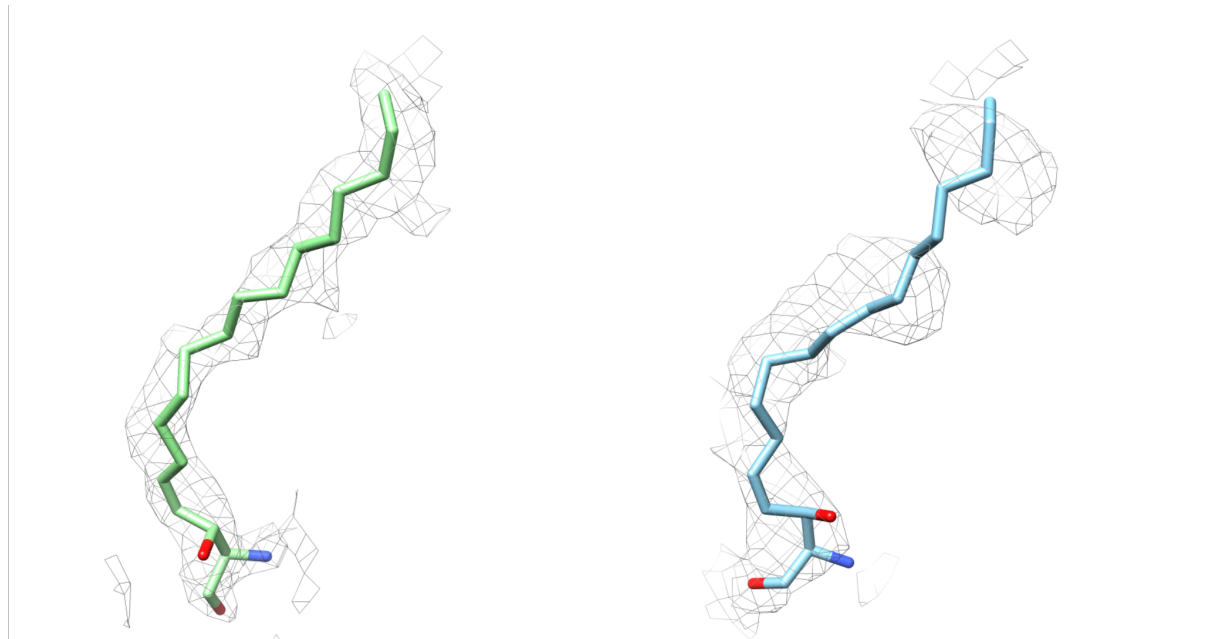

647

648 **Figure S5:** Density indicating occupancy of the pocket, present in the major population (left)  
649 and the minor population (right) shown at 2.5 rmsd.

650

651 **Figure S6:**

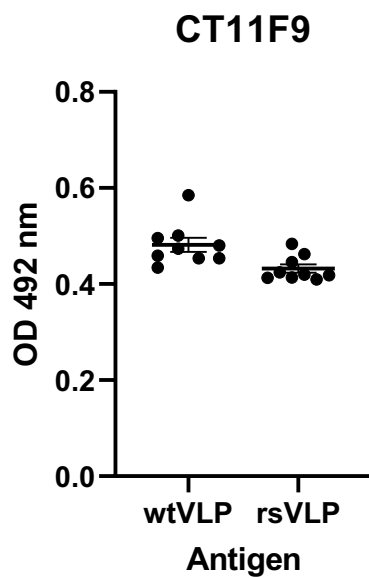

652

653 **Figure S6:** Reactivity of VLP (captured on ELISA plates) with CT11F9 antibody.

654

655

656

657

658 **Table S1:** Antigen composition of samples at a range of temperatures

$$\text{proportion HAg} = 2^{(OD\ 4^\circ\text{C} - OD\ 55^\circ\text{C})/\text{incline}}$$

| Temperature (°C) | pHAg rsVLP | pNAg rsVLP | pHAg wtVLP | pNAg wtVLP |
|------------------|------------|------------|------------|------------|
| 4                | 0.13       | 0.87       | 1.11       | -0.11      |
| 30               | 0.11       | 0.89       | 0.80       | 0.20       |
| 35               | 0.10       | 0.90       | 0.69       | 0.31       |
| 37.5             | 0.11       | 0.89       | 0.84       | 0.16       |
| 40               | 0.14       | 0.86       | 0.97       | 0.03       |
| 42.5             | 0.31       | 0.69       | 1.16       | -0.16      |
| 45               | 0.46       | 0.54       | 1.18       | -0.18      |
| 47.5             | 0.86       | 0.14       | 1.32       | -0.32      |
| 50               | 1.10       | -0.10      | 1.54       | -0.54      |
| 52.5             | 1.07       | -0.07      | 1.17       | -0.17      |
| 55               | 1.00       | 0.00       | 1.00       | 0.00       |
| 60               | 0.80       | 0.20       | 0.73       | 0.27       |

659

660

661

662

663 **Table S2:**

|                                              | rsVLP                 |
|----------------------------------------------|-----------------------|
| Microscope                                   | FEI Titan Krios       |
| Detector mode                                | Counting              |
| Camera                                       | Falcon IV             |
| Voltage (kV)                                 | 300                   |
| Pixel size (Å)                               | 0.91                  |
| Nominal magnification                        | 130,000×              |
| Exposure time (s)                            | 5                     |
| Total dose (e <sup>-</sup> /Å <sup>2</sup> ) | 31                    |
| Number of fractions                          | 42                    |
| Defocus range (μm)                           | -0.8 to -2.9          |
| Number of micrographs                        | 20,419                |
| Acquisition software                         | Thermo Scientific EPU |

664

665

666

667

668

669 **Table S3:**

670

|                                                       |                                        |
|-------------------------------------------------------|----------------------------------------|
| <b>Model</b>                                          | <b><i>rsVLP</i></b>                    |
| <b>EMDB ID</b>                                        | EMD-16450                              |
| <b>PDB ID</b>                                         | PDB-8C6D                               |
| <b>CryoEM map processing</b>                          |                                        |
| <i>Symmetry imposed</i>                               | 11                                     |
| <i>Number of particles contributing to map</i>        | 11,789                                 |
| <i>Map resolution (FSC = 0.143) (Å)</i>               | 2.4                                    |
| <i>Map resolution range at atomic coordinates (Å)</i> | 2.4-2.8                                |
| <i>Map sharpening B factor (Å<sup>2</sup>)</i>        | -133.6                                 |
| <b>Residues modelled</b>                              |                                        |
|                                                       | A 58-297<br>B 13-45, 83-323<br>C 1-242 |
| <b>RMSD</b>                                           |                                        |
| <i>Bond lengths (Å)</i>                               | 0.0096                                 |
| <i>Bond angles (°)</i>                                | 1.33                                   |
| <b>Validation</b>                                     |                                        |
| <i>All-atom clashscore</i>                            | 8.17                                   |
| <i>MolProbity score</i>                               | 2.21                                   |
| <i>Rotamer outliers (%)</i>                           | 3.89                                   |
| <b>Ramachandran plot</b>                              |                                        |
| <i>Favoured (%)</i>                                   | 95.45                                  |
| <i>Allowed (%)</i>                                    | 4.55                                   |
| <i>Outliers (%)</i>                                   | 0.00                                   |

671

672

673

674

675

676

677

678

679
